# Supplementary material for: Transformation of Aquatic Plant Diversity in an Environmentally Sensitive Area, the Lake Taihu Drainage Basin
Source: Frontiers journal article supplement (doi:10.3389/fpls.2020.513788), 2020-11-12
Supplement: Table_1.XLS [file Table_1.XLS]

## Sheet: Sheet1
Date	Location	Habitat type	North latitude	East longitude	pH	Conductivity	DO	Salinity	Dominant species	Companion species
			(°）	(°）		ms/cm	mg/L	‰
2010-07-09	Changxin Country, Huzhou City, Zhejiang Province	pond	31.1126	119.649	7.79	328.2	5.65	0.24	Potamogeton wrightii	Ceratophyllum demersum, Nymphoides indica, Trapella sinensis
2010-07-09	Changxin Country, Huzhou City, Zhejiang Province	pond	30.8745	119.726	9.14	365.6	2.7	0.17	Ceratophyllum demersum	Vallisneria natans, Najas marina, Nymphoides peltata, Zizania latifolia
2010-07-09	Changxin Country, Huzhou City, Zhejiang Province	pond	31.0193	119.76	7.81	241.1	1.52	0.21	Vallisneria natans	Najas minor, Alternanthera philoxeroides
2010-07-09	Changxin Country, Huzhou City, Zhejiang Province	river	30.9284	119.775	8	169.3	7.08	0.16	Myriophyllum spicatum	Ceratophyllum demersum, Monochoria vaginalis
2010-07-10	Wuxing District, Huzhou City, Zhejiang Province	river	30.8924	120.177	8.22	460.7	2.97	0.19	Potamogeton wrightii	Eichhornia crassipes, Trapella sinensis
2010-07-10	Nanxun District, Huzhou City, Zhejiang Province	pond	30.7437	120.276	8.12	369.5	1.86	0.18	Eichhornia crassipes	Lemna minor, Utricularia vulgaris, Pistia stratiotes
2010-07-11	Wujiang District, Suzhou City, Jiangsu Province	pond	31.0116	120.597	8.26	296.9	4.19	0.29	Potamogeton wrightii	Eichhornia crassipes
2010-07-11	Wujiang District, Suzhou City, Jiangsu Province	lake	31.0604	120.687	8.06	425.7	5.72	0.25	Eichhornia crassipes
2010-07-11	Wujiang District, Suzhou City, Jiangsu Province	lake	31.0871	120.765	8.59	437.7	6.45	0.19	Hydrilla verticillata	Utricularia vulgaris, Monochoria vaginalis
2010-07-11	Wujiang District, Suzhou City, Jiangsu Province	lake	30.9784	120.626	7.96	470.8	2.98	0.25	Ceratophyllum demersum	Eichhornia crassipes, Hygroryza aristata
2010-07-12	Jishan Country, Jiaxing City, Zhejiang Province	lake	30.945	120.784	7.84	332.1	4.72	0.17	Nelumbo nucifera	Lemna minor, Eichhornia crassipes, Zizania latifolia, Sparganium stoloniferum
2010-07-12	Xiuzhou District, Jiaxing City, Zhejiang Province	pond	30.8511	120.735	9.2	368.4	3.72	0.11	Hydrocharis dubia	Myriophyllum verticillatum, Nymphoides peltata
2010-07-12	Pinghu Country, Jiaxing City, Zhejiang Province	river	30.7134	121.04	7.87	242.7	2.73	0.17	Eichhornia crassipes	Utricularia vulgaris, Vallisneria denseserrulata
2010-07-12	Wuzhong District, Suzhou City, Jiangsu Province	lake	31.0443	120.446	8.08	428.8	2.99	0.18	Ceratophyllum demersum	Myriophyllum spicatum, Trapa japonica
2010-07-12	Wuzhong District, Suzhou City, Jiangsu Province	lake	31.242	120.699	8.18	372	1.77	0.13	Pistia stratiotes	Ludwigia adscendens
2010-07-13	Wujiang District, Suzhou City, Jiangsu Province	lake	31.0934	120.568	8.28	463.5	7.14	0.16	Potamogeton crispus	Ceratophyllum demersum, Cabomba caroliniana
2010-07-13	Wujiang District, Suzhou City, Jiangsu Province	lake	31.1201	120.43	8.32	298.8	5.7	0.19	Eichhornia crassipes	Myriophyllum verticillatum
2010-07-13	Wujiang District, Suzhou City, Jiangsu Province	lake	31.0474	120.535	8.04	170.6	1.54	0.21	Salvinia natans	Eichhornia crassipes
2010-07-13	Wujiang District, Suzhou City, Jiangsu Province	lake	31.1657	120.453	8.66	440.8	1.87	0.3	Ceratophyllum demersum	Najas marina, Cabomba caroliniana
2010-07-13	Wujiang District, Suzhou City, Jiangsu Province	lake	31.0622	120.476	8.02	675.7	1.15	0.29	Typha orientalis	Alisma plantago-aquatica, Alternanthera philoxeroides, Phragmites australis
2010-07-14	Wuzhong District, Suzhou City, Jiangsu Province	lake	31.1388	120.359	7.77	260.9	5.76	0.25	Eichhornia crassipes	Sparganium stoloniferum, Sagittaria trifolia var. sinensis
2010-07-14	Wuzhong District, Suzhou City, Jiangsu Province	river	31.1024	120.302	7.99	396.1	2.75	0.19	Ceratophyllum demersum	Najas marina, Trapa japonica, Pistia stratiotes
2010-07-14	Wuzhong District, Suzhou City, Jiangsu Province	lake	31.1577	120.348	8.25	243.2	3.45	0.13	Najas minor	Myriophyllum spicatum, Trapa bicornis
2010-07-14	Wuzhong District, Suzhou City, Jiangsu Province	lake	31.1215	120.136	8.06	307.6	2.06	0.29	Eichhornia crassipes	Ceratophyllum demersum, Marsilea quadrifolia
2014-08-21	Danyang Country, Zhenjiang City, Jiangsu Province	pond	31.3778	119.794	8.05	170.1	3.54	0.17	Ceratophyllum demersum	Ludwigia adscendens
2014-08-21	Danyang Country, Zhenjiang City, Jiangsu Province	pond	31.9552	119.535	8.27	263	9.76	0.21	Vallisneria natans	Ceratophyllum demersum, Phragmites australis
2014-08-22	Wujin District, Changzhou City, Jiangsu Province	pond	31.5863	119.964	8.18	170.9	9.41	0.16	Typha orientalis	Zizania latifolia, Monochoria vaginalis, Sparganium stoloniferum
2014-08-22	Wujin District, Changzhou City, Jiangsu Province	pond	31.6248	120.022	8.32	298.3	6.41	0.13	Cabomba caroliniana	Najas marina, Myriophyllum verticillatum
2014-08-22	Jintan Country, Changzhou City, Jiangsu Province	river	31.7527	119.567	8.11	227.2	4.73	0.19	Ceratophyllum demersum	Cabomba caroliniana
2014-08-23	Liyang Country, Changzhou City, Jiangsu Province	pond	31.2722	119.517	8.65	440	4.71	0.18	Eichhornia crassipes	Myriophyllum verticillatum, Alternanthera philoxeroides
2014-08-23	Liyang Country, Changzhou City, Jiangsu Province	pond	31.8748	119.703	7.56	269.7	5.83	0.11	Ceratophyllum demersum	Potamogeton wrightii, Trapa bicornis, Sagittaria trifolia var. sinensis
2014-08-24	Yixing Country, Wuxi City, Jiangsu Province	lake	31.8083	120.269	7.34	386.7	3.51	0.17	Lemna minor	Ceratophyllum demersum
2014-08-24	Yixing Country, Wuxi City, Jiangsu Province	pond	31.7776	120.381	7.85	398.1	4.25	0.16	Eichhornia crassipes
2014-08-24	Yixing Country, Wuxi City, Jiangsu Province	pond	31.4805	119.901	7.27	410.6	3.37	0.27	Lemna minor	Najas marina
2014-08-24	Yixing Country, Wuxi City, Jiangsu Province	pond	31.4813	120.009	7.03	397.5	7.63	0.26	Lemna minor	Ceratophyllum demersum
2014-08-24	Yixing Country, Wuxi City, Jiangsu Province	river	31.492	119.945	7.26	339.7	6.37	0.23	Vallisneria natans	Nymphoides peltata
2014-08-24	Yixing Country, Wuxi City, Jiangsu Province	lake	31.5065	120.139	7.47	200	12.45	0.17	Myriophyllum spicatum	Euryale ferox
2014-08-25	Yixing Country, Wuxi City, Jiangsu Province	pond	31.3275	119.857	8.13	171.6	3.73	0.17	Ceratophyllum demersum	Potamogeton crispus
2014-08-25	Yixing Country, Wuxi City, Jiangsu Province	pond	31.4608	119.974	8.33	268.2	9.96	0.21	Vallisneria natans	Ceratophyllum demersum
2014-08-26	Kunshan District, Suzhou City, Jiangsu Province	pond	31.3025	120.922	8.25	174.7	9.82	0.16	Cabomba caroliniana	Calla palustris, Potamogeton wrightii
2014-08-26	Kunshan District, Suzhou City, Jiangsu Province	river	31.349	120.992	8.39	100.3	6.46	0.13	Lemna minor	Nymphoides peltata, Vallisneria denseserrulata
2014-08-26	Kunshan District, Suzhou City, Jiangsu Province	river	31.2342	120.993	8.19	232.2	5.12	0.19	Ceratophyllum demersum
2014-08-27	Xiangcheng District, Suzhou City, Jiangsu Province	pond	31.3465	120.636	8.72	244.6	4.76	0.18	Vallisneria natans	Eichhornia crassipes, Pistia stratiotes, Trapella sinensis
2014-08-27	Xiangcheng District, Suzhou City, Jiangsu Province	lake	31.3726	120.686	8.08	282	3.75	0.3	Eichhornia crassipes	Lemna minor, Calla palustris, Ipomoea aquatica
2014-08-27	Xiangcheng District, Suzhou City, Jiangsu Province	lake	31.4185	120.791	7.83	266.9	4.05	0.29	Hydrilla verticillata	Ipomoea aquatica
2014-08-27	Wujiang District, Suzhou City, Jiangsu Province	channel	30.9467	120.394	8.43	372.1	2	0.26	Ceratophyllum demersum	Eichhornia crassipes, Najas minor
2014-08-28	Wuzhong District, Suzhou City, Jiangsu Province	channel	31.2942	120.673	9.94	195.9	8.1	0.18	Hydrocharis dubia	Potamogeton wrightii
2014-08-28	Wuzhong District, Suzhou City, Jiangsu Province	lake	31.2277	120.74	8.49	262.3	4.11	0.12	Hydrilla verticillata	Myriophyllum verticillatum
2014-08-28	Wuzhong District, Suzhou City, Jiangsu Province	channel	31.2283	120.669	8.72	184.1	4.65	0.18	Vallisneria natans	Eichhornia crassipes, Blyxa japonica
2014-08-28	Wuzhong District, Suzhou City, Jiangsu Province	channel	31.2569	120.664	8.94	300.9	8.3	0.22	Eichhornia crassipes
2014-08-28	Wujiang District, Suzhou City, Jiangsu Province	lake	30.9903	120.263	8.89	202.9	2.71	0.18	Hydrilla verticillata	Lemna minor
2014-08-28	Wujiang District, Suzhou City, Jiangsu Province	lake	31.031	120.837	9.01	118.4	7	0.14	Salvinia natans	Lemna minor, Alternanthera philoxeroides
2014-08-28	Wujiang District, Suzhou City, Jiangsu Province	lake	31.041	120.891	8.69	264.7	7.41	0.21	Ceratophyllum demersum	Cabomba caroliniana
2014-08-28	Qingpu District, Shanghai Municipality	lake	31.1342	120.881	9.34	275.3	5.1	0.2	Nelumbo nucifera	Nymphoides indica
2014-08-29	Jiashan Country, Jiaxing City, Zhejiang Province	river	30.7989	120.922	8.7	330.7	3.87	0.32	Cabomba caroliniana	Lemna minor, Euryale ferox
2014-08-29	Wuxing District, Huzhou City, Zhejiang Province	lake	30.6556	120.102	8.39	312.8	5.16	0.31	Myriophyllum spicatum	Ceratophyllum demersum
2014-08-29	Yuhang District, Hangzhou City, Zhejiang Province	pond	30.367	120.068	8.61	242.6	3.7	0.27	Eichhornia crassipes	Lemna minor, Myriophyllum verticillatum
2014-08-30	Changxing Country, Huzhou City, Zhejiang Province	lake	31.0767	119.94	8.86	270.2	4.82	0.2	Hydrocharis dubia	Ludwigia adscendens
2014-08-30	Changxing Country, Huzhou City, Zhejiang Province	pond	31.1554	119.892	8.7	135.7	2.78	0.14	Ceratophyllum demersum	Cabomba caroliniana, Lemna minor
2014-08-30	Nanxun District, Huzhou City, Zhejiang Province	river	30.8813	120.425	8.46	373.3	4.5	0.26	Cabomba caroliniana
2018-06-12	Binhu District, Wuxi City, Jiangsu Province	pond	31.4099	120.115	9.97	199.6	1.17	0.19	Vallisneria denseserrulata	Hydrocharis dubia
2018-06-12	Binhu District, Wuxi City, Jiangsu Province	channel	31.5058	120.131	8.52	262.7	3.94	0.12	Ceratophyllum demersum	Trapa bicornis
2018-06-12	Binhu District, Wuxi City, Jiangsu Province	lake	31.5347	120.217	8.7	185.1	2.04	0.18	Eichhornia crassipes	Ceratophyllum demersum
2018-06-13	Binhu District, Wuxi City, Jiangsu Province	lake	31.4061	120.333	8.76	256.4	3.1	0.2	Myriophyllum aquaticum	Vallisneria natans
2018-06-14	Binhu District, Wuxi City, Jiangsu Province	channel	31.4593	120.324	9.27	75.9	7.69	0.2	Eichhornia crassipes	Myriophyllum spicatum
2018-06-14	Binhu District, Wuxi City, Jiangsu Province	pond	31.5344	120.153	8.68	331.9	1.77	0.32	Cabomba caroliniana
2018-07-06	Wuzhong District, Suzhou City, Jiangsu Province	channel	31.2867	120.875	8.21	302.7	2.97	0.31	Ceratophyllum demersum	Lemna minor
2018-07-06	Xiangcheng District, Suzhou City, Jiangsu Province	lake	31.4159	120.4	8.66	235.8	3.76	0.27	Eichhornia crassipes	Ludwigia adscendens
2018-07-23	Huqiu District, Suzhou City, Jiangsu Province	river	31.31	120.3	8.84	281	1.14	0.2	Cabomba caroliniana	Ceratophyllum demersum
2018-07-23	Huqiu District, Suzhou City, Jiangsu Province	pond	31.3325	120.325	8.6	133.7	2.02	0.14	Lemna minor	Cabomba caroliniana, Nymphoides indica
2018-07-23	Huqiu District, Suzhou City, Jiangsu Province	lake	31.2968	120.346	8.49	364	4.5	0.26	Ceratophyllum demersum
2018-07-23	Huqiu District, Suzhou City, Jiangsu Province	pond	31.3572	120.366	9.92	180	1.16	0.18	Lemna minor	Potamogeton wrightii
2018-07-23	Huqiu District, Suzhou City, Jiangsu Province	lake	31.1867	120.44	8.52	62.5	3.93	0.11	Eichhornia crassipes
2018-07-23	Huqiu District, Suzhou City, Jiangsu Province	pond	31.2226	120.512	8.69	185.2	2.09	0.18	Alternanthera philoxeroides	Eichhornia crassipes
2018-07-23	Huqiu District, Suzhou City, Jiangsu Province	lake	31.3928	120.399	8.86	301.2	4.53	0.23	Lemna minor	Cabomba caroliniana
2018-07-24	Kunshan District, Suzhou City, Jiangsu Province	lake	31.4408	120.837	8.74	201.3	3.35	0.18	Eichhornia crassipes	Lemna minor
2018-07-24	Kunshan District, Suzhou City, Jiangsu Province	lake	31.4465	120.831	9.02	121.9	2.68	0.14	Trapa japonica	Potamogeton wrightii
2018-07-24	Kunshan District, Suzhou City, Jiangsu Province	river	31.4852	120.856	8.78	261.5	3.09	0.2	Cabomba caroliniana
2018-07-24	Kunshan District, Suzhou City, Jiangsu Province	channel	31.1716	120.864	9.25	276.2	7.43	0.19	Eichhornia crassipes	Alternanthera philoxeroides
2018-07-25	Kunshan District, Suzhou City, Jiangsu Province	pond	31.1656	120.857	8.69	529.9	1.78	0.32	Salvinia natans	Myriophyllum spicatum
2018-07-25	Kunshan District, Suzhou City, Jiangsu Province	lake	31.4772	120.874	8.1	511.5	2.99	0.31	Cabomba caroliniana	Eichhornia crassipes
2018-07-26	Qingpu District, Shanghai Municipality	lake	31.027	120.905	6.74	384.1	4.65	0.19	Myriophyllum spicatum	Lemna minor
2018-07-26	Qingpu District, Shanghai Municipality	pond	31.0272	120.905	9.98	196.7	1.17	0.19	Eichhornia crassipes	Cabomba caroliniana
2018-07-27	Wujiang District, Suzhou City, Jiangsu Province	lake	31.0906	120.509	8.88	202.5	3.33	0.17	Ceratophyllum demersum
2018-07-27	Wujiang District, Suzhou City, Jiangsu Province	pond	30.9728	120.514	9.02	119.1	2.74	0.14	Cabomba caroliniana	Pistia stratiotes
2018-07-27	Wujiang District, Suzhou City, Jiangsu Province	river	30.8471	120.474	8.81	263.9	3.15	0.21	Najas marina	Eichhornia crassipes
2018-07-28	Wujiang District, Suzhou City, Jiangsu Province	lake	30.92	120.673	8.64	242	3.75	0.27	Hydrocharis dubia	Potamogeton crispus
2018-07-28	Wujiang District, Suzhou City, Jiangsu Province	pond	31.0105	120.729	8.94	276.8	1.23	0.21	Hydrilla verticillata	Euryale ferox
2018-07-29	Wujiang District, Suzhou City, Jiangsu Province	pond	31.0808	120.746	8.73	134.9	2.05	0.14	Vallisneria natans	Trapa incisa
2018-07-29	Wujiang District, Suzhou City, Jiangsu Province	pond	31.0804	120.788	8.49	375.1	4.5	0.26	Nelumbo nucifera	Hydrilla verticillata
2018-08-06	Kunshan District, Suzhou City, Jiangsu Province	channel	31.4756	120.882	8.68	447.4	3.78	0.27	Eichhornia crassipes	Salvinia natans
2018-08-06	Kunshan District, Suzhou City, Jiangsu Province	lake	31.1443	120.888	8.75	277.9	1.25	0.21	Cabomba caroliniana	Ceratophyllum demersum, Utricularia vulgaris
2018-08-06	Kunshan District, Suzhou City, Jiangsu Province	river	31.4776	120.826	8.67	136.2	2.04	0.14	Eichhornia crassipes	Vallisneria denseserrulata
2018-08-06	Kunshan District, Suzhou City, Jiangsu Province	pond	31.3427	120.934	8.94	302.5	4.53	0.22	Hydrilla verticillata	Lemna minor
2018-08-11	Yixing Country, Wuxi City, Jiangsu Province	river	31.3948	119.754	8.36	58.5	3.93	0.11	Zizania latifolia	Eichhornia crassipes
2018-08-11	Yixing Country, Wuxi City, Jiangsu Province	pond	31.4133	119.764	8.72	179.6	2.06	0.18	Trapa incisa	Najas marina, Hydrilla verticillata
2018-08-11	Yixing Country, Wuxi City, Jiangsu Province	pond	31.46	119.796	8.98	503.3	4.53	0.22	Cabomba caroliniana	Lemna minor
2018-08-12	Yixing Country, Wuxi City, Jiangsu Province	river	31.215	119.794	8.8	401.6	3.34	0.18	Potamogeton crispus	Cabomba caroliniana
2018-08-12	Yixing Country, Wuxi City, Jiangsu Province	pond	31.4949	119.821	8.83	121.9	2.71	0.14	Hydrilla verticillata
2018-08-12	Yixing Country, Wuxi City, Jiangsu Province	river	31.2895	119.849	8.81	259.2	3.09	0.2	Calla palustris	Cabomba caroliniana
2018-08-12	Yixing Country, Wuxi City, Jiangsu Province	pond	31.3077	119.855	9.4	276.6	7.62	0.2	Lemna minor	Hydrilla verticillata
2018-08-12	Yixing Country, Wuxi City, Jiangsu Province	lake	31.412	119.929	8.6	533.5	1.75	0.32	Eichhornia crassipes	Alisma plantago-aquatica
2018-08-12	Yixing Country, Wuxi City, Jiangsu Province	channel	31.4219	120.007	8.37	514.5	2.99	0.32	Hydrilla verticillata	Eichhornia crassipes
2018-08-13	Binhu District, Wuxi City, Jiangsu Province	pond	31.399	120.232	8.9	304.2	4.53	0.22	Alternanthera philoxeroides
2018-08-13	Binhu District, Wuxi City, Jiangsu Province	pond	31.5136	120.241	8.83	203.5	3.36	0.18	Ludwigia adscendens	Nelumbo nucifera
2018-08-13	Binhu District, Wuxi City, Jiangsu Province	lake	31.4088	120.277	9.02	121.5	2.7	0.14	Eichhornia crassipes	Lemna minor
2018-09-06	Wujin District, Changzhou City, Jiangsu Province	pond	31.5539	119.836	8.64	447.4	3.75	0.28	Hygroryza aristata	Cabomba caroliniana, Nymphoides peltata
2018-09-06	Wujin District, Changzhou City, Jiangsu Province	pond	31.4784	120.064	8.91	272.2	1.18	0.2	Cabomba caroliniana	Stuckenia filiformis
2018-09-07	Wujin District, Changzhou City, Jiangsu Province	pond	31.5747	119.889	8.69	132	2.09	0.14	Hydrilla verticillata	Zizania latifolia
2018-09-26	Kunshan District, Suzhou City, Jiangsu Province	river	31.4409	120.836	8.28	373.4	4.5	0.26	Ludwigia adscendens	Hydrilla verticillata
2018-09-26	Kunshan District, Suzhou City, Jiangsu Province	pond	31.248	120.855	9.79	198.5	1.17	0.19	Cabomba caroliniana	Utricularia vulgaris
2018-09-26	Kunshan District, Suzhou City, Jiangsu Province	channel	31.1667	120.892	8.5	263.8	3.94	0.12	Alternanthera philoxeroides	Eichhornia crassipes
2018-09-26	Kunshan District, Suzhou City, Jiangsu Province	river	31.1717	120.896	8.63	179	2.08	0.18	Nymphoides indica	Typha angustifolia
2018-09-27	Wujiang District, Suzhou City, Jiangsu Province	river	30.8515	120.573	8.67	330.6	1.78	0.32	Eichhornia crassipes	Myriophyllum spicatum, Hydrilla verticillata
2018-09-28	Wujiang District, Suzhou City, Jiangsu Province	river	30.9847	120.532	9.31	277.2	7.41	0.2	Hydrilla verticillata	Ipomoea aquatica
2018-09-28	Wujiang District, Suzhou City, Jiangsu Province	channel	31.1576	120.608	8.17	311.2	3.11	0.31	Cabomba caroliniana
2018-10-03	Wujin District, Changzhou City, Jiangsu Province	pond	31.5423	119.962	8.86	302.5	4.53	0.23	Hydrilla verticillata	Cabomba caroliniana
2018-10-03	Changxing Country, Huzhou City, Zhejiang Province	channel	31.0041	119.925	8.82	200.1	3.4	0.18	Cabomba caroliniana	Hydrocharis dubia
2018-10-03	Changxing Country, Huzhou City, Zhejiang Province	channel	31.0704	119.971	9.01	122.5	2.71	0.13	Euryale ferox
2018-10-03	Changxing Country, Huzhou City, Zhejiang Province	pond	31.1255	119.738	8.8	265.1	3.09	0.2	Sagittaria trifolia var. sinensis	Phragmites australis, Typha orientalis
2018-10-03	Changxing Country, Huzhou City, Zhejiang Province	lake	30.9741	120.055	9.17	275.7	7.41	0.2	Cabomba caroliniana	Nymphoides peltata
2018-10-04	Nanxun District, Huzhou City, Zhejiang Province	river	30.8168	120.245	8.56	323.6	3.74	0.32	Pistia stratiotes	Hydrilla verticillata	120.245	8.45042	334	1.77	0.32	Nanxun District, Huzhou City, Zhejiang Province	river	30.8128	120.245	8.45042	334	1.77	0.32	Nanxun District, Huzhou City, Zhejiang Province	river	30.8128	120.245	8.45042	334	1.77	0.32	Nanxun District, Huzhou City, Zhejiang Province	river	30.8128	120.245	8.45042	334	1.77	0.32	Nanxun District, Huzhou City, Zhejiang Province	river	30.8128	120.245	8.45042	334	1.77	0.32	Nanxun District, Huzhou City, Zhejiang Province	river
2018-10-04	Nanxun District, Huzhou City, Zhejiang Province	river	30.8128	120.245	8.45	334	1.77	0.32	Potamogeton wrightii	Cabomba caroliniana
2018-10-04	Xiuzhou District, Jiaxing City, Zhejiang Province	pond	30.8078	120.547	8.11	314	3.01	0.31	Trapa bicornis	Trapa japonica
2018-10-04	Wuxing District, Huzhou City, Zhejiang Province	river	30.9242	120.168	8.69	248	3.75	0.28	Cabomba caroliniana	Eichhornia crassipes
2018-10-04	Wuxing District, Huzhou City, Zhejiang Province	river	30.9246	120.22	8.86	279.4	1.22	0.2	Hydrocharis dubia
2018-10-04	Wuxing District, Huzhou City, Zhejiang Province	river	30.8966	120.318	8.75	135.7	2.03	0.14	Cabomba caroliniana
[truncated: 206 more columns]
